# Supplementary material for: In the Name of the Father? Fertility, Religion, and Child Naming in the Demographic Transition
Source: Oxford University Press journal article supplement (doi:10.1215/00703370-9427093), 2021-09-06
Supplement: connor_esm.pdf [file connor_esm.pdf]

## Online Appendix

Table A1. Regression estimating the impact of religious indicators on net fertility by marital duration with alternate control variables and sample restrictions

|                                                                            |                                        | <i>Y = Net fertility</i> |                      |
|----------------------------------------------------------------------------|----------------------------------------|--------------------------|----------------------|
|                                                                            |                                        | (1)                      | (2)                  |
| <i>A. Name measures for first child only</i>                               | Catholic Index, children (log)         | 0.029***<br>(0.005)      | 0.019***<br>(0.005)  |
|                                                                            | Traditional Name Score, children (log) |                          | 0.006***<br>(0.002)  |
|                                                                            | N                                      | 129779                   | 129779               |
| <i>B. Poisson estimation</i>                                               | Catholic Index, children (log)         | 0.089***<br>(0.003)      | 0.031***<br>(0.004)  |
|                                                                            | Traditional Name Score, children (log) |                          | 0.044***<br>(0.001)  |
|                                                                            | N                                      | 130563                   | 130563               |
| <i>C. Sample restricted to recently married (&lt;5 years)</i>              | Catholic Index, children (log)         | 0.056***<br>(0.005)      | 0.011*<br>(0.005)    |
|                                                                            | Traditional Name Score, children (log) |                          | 0.032***<br>(0.001)  |
|                                                                            | N                                      | 34375                    | 34375                |
| <i>D. Catholic Index replace with share of children with biblical name</i> | Share of children with biblical name   | -0.121***<br>(0.010)     | -0.450***<br>(0.012) |
|                                                                            | Traditional Name Score, children (log) |                          | 0.143***<br>(0.002)  |
|                                                                            | N                                      | 130596                   | 130596               |
| Sample                                                                     |                                        | Couples                  | Couples              |
| Controls                                                                   |                                        |                          |                      |
| Marital duration                                                           |                                        | Y                        | Y                    |
| Age at marriage                                                            |                                        | Y                        | Y                    |
| Catholic Index, couple                                                     |                                        | Y                        | Y                    |
| Religion & mixed marriage                                                  |                                        | Y                        | Y                    |
| County of birth                                                            |                                        | Y                        | Y                    |
| Husband's occ.                                                             |                                        | Y                        | Y                    |
| Literacy                                                                   |                                        | Y                        | Y                    |
| Migrant                                                                    |                                        | Y                        | Y                    |
| DED FE                                                                     |                                        | Y                        | Y                    |
| Patronym or Matronym, first children                                       |                                        | Y                        | Y                    |

\*  $p < 0.05$ , \*\*  $p < 0.01$ , \*\*\*  $p < 0.001$ , Robust standard errors in parentheses

Notes: OLS regression estimates of the association between religious indicators and net fertility by marital duration. The sample is restricted to mothers married less than 15 years, with spouse present, aged 16-49 and married between ages 16-40. These models differ to Table 3 in: measuring naming from the first-born children (Row A); using a Poisson instead of an OLS model (Row B); restricted to recently married couples (Row C); replacing the Catholic Index with the share of children with biblical names (Row D). These estimates are based on a modified version of the model described in Equation 3.

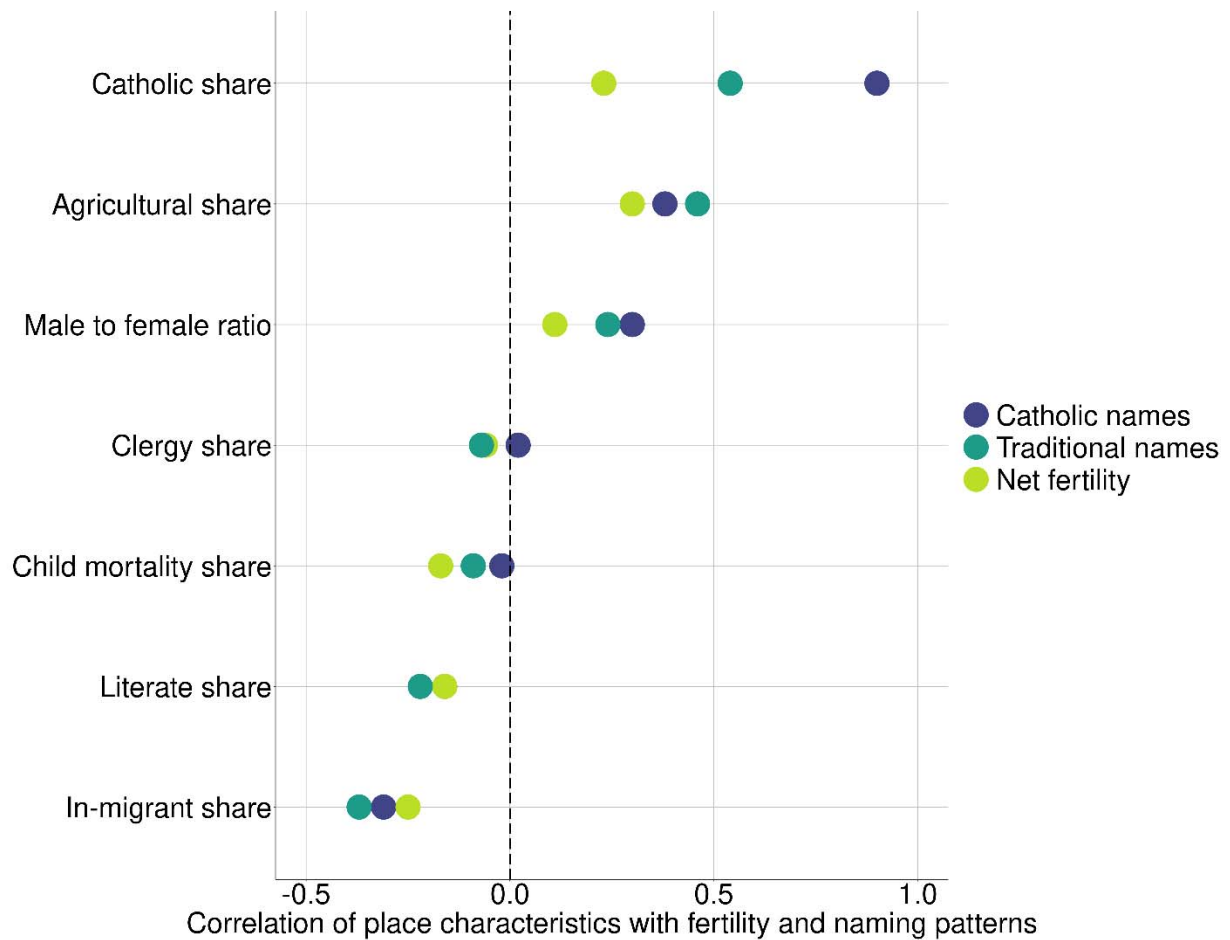

Figure A1. Correlation of characteristics of 1911 place of residence with fertility and naming patterns

Note: Correlation coefficients for DED characteristics with net fertility, Catholic Index of children's names and the Traditional Name Score of children's names. These correlations are based on 24 separate bivariate correlations between the three outcomes of interest and the seven place characteristics, all measured at the DED scale.
